# Supplementary material
Source: publisher figshare collection journal article supplement (https://tandf.figshare.com/ndownloader/files/13174955)
Supplement: Supplementary file 1 [file 13174955]

| <b>Classification of patients as fit, vulnerable or frail, based on the findings of the CGA</b> |                          |                                                   |
|-------------------------------------------------------------------------------------------------|--------------------------|---------------------------------------------------|
|                                                                                                 | Fit: All of the criteria | Frail: Any of the criteria                        |
| Use of medications                                                                              | <5                       | >7                                                |
| ADL                                                                                             | ≥90                      | <90                                               |
| IADL*                                                                                           | 0-1 in all domains       |                                                   |
| Comorbidity                                                                                     | <3 comorbidity grade 2   | Any grade 4 comorbidity<br>≥3 comorbidity grade 3 |
| Cognition                                                                                       | MMSE > 26                | MMSE<24                                           |
| Mental                                                                                          | GDS15 <5                 | GDS15 ≥5                                          |
| Nutrition                                                                                       | MNA ≥24                  | MNA < 17                                          |

Patients neither fit nor frail were classified as vulnerable

ADL: Activities of daily living

IADL: Instrumental Activities of daily living. \*Only used for classifying patients as fit.

MMSE: Mini Mental State Examination

GDS15: Geriatric Depression scale-15-item

MNA: Mini Nutritional Assessment
